# Supplementary material for: Specific Human ATR and ATM Inhibitors Modulate Single Strand DNA Formation in Leishmania major Exposed to Oxidative Agent
Source: Front Cell Infect Microbiol. 2022 Jan 4;11:802613. doi: 10.3389/fcimb.2021.802613 (PMC8763966; doi:10.3389/fcimb.2021.802613)
Supplement: Supplementary file 1 [file DataSheet_1.zip]

Archive with 4 entries (3 files):
- Data-Sheet_1/
- Data-Sheet_1/Exo1-ssDNA-Suppl-Material-Figures.pdf
- Data-Sheet_1/Exo1-ssDNA-Suppl-Material-Table-1.pdf
- Data-Sheet_1/Exo1-ssDNA-Suppl-Material-Table-2.pdf
